# 1 **Proportion of paediatric admissions with any stage of noma at the** 2 **Anka General Hospital, northwest Nigeria**

3 Short title: Noma in paediatric admissions in northwest Nigeria

4

5 Elise Sarah Farley <sup>1</sup>, Miriam Njoki Karinja <sup>2</sup>, Abdulhakeem Mohammed Lawal <sup>2</sup>, Michael Olaleye <sup>1</sup>,

6 Sadiya Muhammad <sup>2</sup>, Maryam Umar <sup>2</sup>, Fatima Khalid Gaya <sup>2</sup>, Shirley Chioma Mbaeri <sup>2</sup>, Mark

7 Sherlock <sup>3</sup>, Deogracia Wa Kabila <sup>1</sup>, Miriam Peters <sup>2</sup>, Joseph Samuel <sup>1</sup>, Guy Maloba <sup>2</sup>, Rabi Usman <sup>4</sup>,

8 Saskia van der Kam <sup>3</sup>, Koert Ritmeijer <sup>3</sup>, Cono Ariti <sup>5</sup>, Mohana Amirtharajah <sup>3</sup>, Grégoire Falq <sup>3</sup>

9

## 10 **Affiliations**

11 1 Médecins Sans Frontières, Noma Children's Hospital, Sokoto, Nigeria

12 2 Médecins Sans Frontières, Nigeria Mission, Zamfara and Abuja, Nigeria

13 3 Médecins Sans Frontières, Amsterdam, Netherlands

14 4 Zamfara Ministry of Health, Zamfara, Nigeria

15 5 London School of Hygiene and Tropical Medicine, London, United Kingdom

16

17

18 Key words: noma, cancrum oris, malnutrition

19

20

21

**NOTE: This preprint reports new research that has not been certified by peer review and should not be used to guide clinical practice.**

22 **Author contributions**

23 Elise Sarah Farley (0000-0003-4457-4068): Conceptualization, Data Curation, Formal Analysis,  
24 Investigation, Methodology, Writing – Original Draft Preparation.

25 Miriam Njoki Karinja (0000-0003-0474-9492): Data Curation, Investigation, Project Administration,  
26 Supervision, Writing – Review & Editing.

27 Abdulhakeem Mohammed Lawal: Data Curation, Investigation, Project Administration, Supervision,  
28 Writing – Review & Editing.

29 Michael Olaleye (0009-0003-4101-8469): Data Curation, Investigation, Project Administration,  
30 Supervision, Writing – Review & Editing.

31 Sadiya Muhammad: Investigation, Writing – Review & Editing.

32 Maryam Umar: Investigation, Writing – Review & Editing.

33 Fatima Khalid Gaya: Investigation, Writing – Review & Editing.

34 Shirley Chioma Mbaeri: Investigation, Writing – Review & Editing.

35 Mark Sherlock (0009-0005-8186-4365): Conceptualization, Funding Acquisition, Writing – Review  
36 & Editing.

37 Deogracia Wa Kabila: Funding Acquisition, Writing – Review & Editing.

38 Miriam Peters: Funding Acquisition, Writing – Review & Editing.

39 Joseph Samuel: Conceptualization, Funding Acquisition, Writing – Review & Editing.

40 Guy Maloba: Funding Acquisition, Writing – Review & Editing.

41 Rabi Usman (0000-0001-7869-5357): Writing – Review & Editing.

42 Saskia van der Kam (0000-0002-3608-8054): Conceptualization, Writing – Review & Editing.

43 Koert Ritmeijer (0000-0001-5924-872X): Conceptualization, Writing – Review & Editing.

44 Cono Ariti (0000-0001-7615-0935): Conceptualization, Formal Analysis, Methodology, Supervision,  
45 Writing – Review & Editing.

46 Mohana Amirtharajah (0000-0002-4779-0308): Conceptualization, Funding Acquisition,  
47 Methodology, Supervision, Writing – Review & Editing.

48 Grégoire Falq (0009-0002-2116-6475): Formal Analysis, Supervision, Writing – Review & Editing.

49

50

51

53

54 **ABSTRACT**

---

55 **Introduction**

56 Noma is a rapidly spreading infection of the oral cavity which mainly affects young children, and  
57 without early treatment, can have a high mortality rate. Simple gingivitis is a warning sign for noma,  
58 and acute necrotizing gingivitis is the first stage of noma. The epidemiology of noma is not well  
59 understood. We aimed to gather evidence on the epidemiology of noma and its association with  
60 malnutrition for use in program planning.

61 **Methods**

62 We conducted a prospective observational study enrolling patients aged 0 to 12 years who were  
63 admitted to the Anka General Hospital, Zamfara, northwest Nigeria. Consenting caregivers of  
64 participants were interviewed at admission. Participants had anthropometric and oral exams at  
65 admission and discharge.

66 **Findings**

67 Of the 2346 participants, 58 (2.5%) were diagnosed with simple gingivitis and six (n=0.3%) with acute  
68 necrotizing gingivitis upon admission. Of those admitted to the Inpatient Therapeutic Feeding Centre  
69 (ITFC), 3.4% (n=37, CI 2.5 - 4.7%) were diagnosed with simple gingivitis upon admission compared  
70 to 1.7% of those not admitted to the ITFC (n=21, CI 1.1 - 2.6%) (p=0.008). Risk factors identified for  
71 having simple gingivitis include being aged over two years (2 to 6yrs old, odds ratio (OR) 3.4, CI 1.77  
72 - 6.5; 7 to 12 yrs OR 5.0, CI 1.7 - 14.6; p<0.001) and being admitted to the ITFC (OR 2.1; CI 1.22 -  
73 3.62).

74 **Conclusion**

75 Our study showed a small proportion of those admitted to the Anka General Hospital had simple or  
76 acute necrotizing gingivitis. Those admitted to the ITFC were more likely to have simple gingivitis.  
77 The lack of access to and uptake of oral health care indicates a strong need for oral exams to be

78 included in routine health services. This provision could improve the oral status of the population and  
79 decrease the chance of patients developing noma.

80

81

82

83

84

85

86

87

88

89 **AUTHOR SUMMARY**

---

90 Noma is a rapidly spreading infection of the oral cavity which mainly affects young children and  
91 without early treatment, can have a high mortality rate. Simple gingivitis is a warning sign for noma,  
92 and acute necrotizing gingivitis is the first stage of noma. We aimed to gather evidence on the  
93 epidemiology of noma and its association with malnutrition by conducting a prospective observational  
94 study enrolling 2346 patients aged 0 to 12 years who were admitted to the Anka General Hospital,  
95 Zamfara, northwest Nigeria. Consenting caregivers of participants were interviewed at admission.  
96 Participants had anthropometric and oral exams at admission and discharge. Our study showed a small  
97 proportion of those admitted to the Anka General Hospital had simple or acute necrotizing gingivitis.  
98 Those admitted to the ITFC were more likely to have simple gingivitis. The lack of access to and uptake  
99 of oral health care indicates a strong need for oral exams to be included in routine health services. This  
100 provision could improve the oral status of the population and decrease the chance of patients developing  
101 noma.

102

103

## 104 INTRODUCTION

---

105 Noma is an infection of the oral cavity which can cause the disintegration of the cheek, nose and/or eye  
106 in a few weeks [1]. If untreated in the early reversible stages, noma has a reported 90% mortality rate  
107 [2] and mainly affects children aged between two and six years [3]. Deaths in noma patients are  
108 primarily due to starvation, aspiration pneumonia, respiratory insufficiency or sepsis [4,5]. With timely  
109 antibiotic treatment, wound debridement and nutritional support, morbidity and mortality from noma  
110 greatly decrease [1]. For those who survive, noma often leads to severe facial disfigurement, functional  
111 issues and stigmatization [1,2,6,7]. The WHO classifies noma into stages: Warning Sign: simple  
112 gingivitis, Stage 1: acute necrotizing gingivitis, Stage 2: oedema, Stage 3: gangrene, Stage 4: scarring  
113 and Stage 5: sequelae [2].

114 There is limited research on noma and as a result, many gaps in knowledge exist around the disease [1].  
115 The aetiology of noma is unknown but thought to be multifactorial [1]. Risk factors for noma include  
116 poverty, poor oral hygiene, poor access to routine childhood vaccinations, limited access to quality  
117 health care and immunosuppression resulting from comorbidities such as malnutrition, measles and  
118 HIV [1,8–16]. Malnutrition is frequently listed as a risk factor for noma, however, evidence supporting  
119 this theory is largely based on case reports and case series [11,17–27] and a handful of primary studies  
120 [8–10,28–30]. The epidemiology of the disease is also not well understood. The WHO estimates that  
121 140, 000 children contract noma each year globally [31]. In 2003, a northwest Nigerian study estimated  
122 the noma incidence was 6.4 per 1000 children from 1996 to 2001 [32]. A recent study estimated that  
123 the period prevalence of noma from 2010-2018 was 1.6 per 100,000 population at risk in northern  
124 Nigeria [33]. A 2019 prevalence study in Sokoto and Kebbi states, Nigeria, identified that in children  
125 aged 0 to 15 years (n=7122), simple gingivitis was diagnosed in 3.1% (n=181; 95% confidence interval  
126 (CI) 2.6-3.8), acute necrotizing gingivitis in 0.1% (n=10; CI 0.1-0.3), and oedema in 0.05% (n=3; CI  
127 0.02-0.2), no late stage noma cases were identified [34].

128 We conducted a prospective observational study assessing the proportion of pediatric admissions at  
129 the Anka General Hospital with any stage of noma, to add to the understanding of the epidemiology  
130 of the disease and examine the links between noma and malnutrition.

## 131 **METHODS**

---

### 132 **STUDY DESIGN AND DATA COLLECTION**

133 From 1<sup>st</sup> June to 24<sup>th</sup> October 2021, we conducted a prospective observational study utilising face-to-  
134 face interviews with caregivers of paediatric patients (aged under 12 years) admitted to the Anka  
135 General Hospital, northwest Zamfara, Nigeria and physical examinations of the patients themselves.  
136 All caregivers of patients admitted between 09h00 and 16h00 Monday to Sunday were approached on  
137 the day of admission by the study nurse. Consenting individuals were enrolled (discussed in the Ethics  
138 section below). A tablet-based RedCap data collection form was used to collect the study specific data  
139 on admission (sociodemographic characteristics, infant and current feeding practices, oral health  
140 practices, health care access, oral examination, mid upper arm circumference, weight, and height) and  
141 at discharge (oral exam and access to routinely collected medical records).

### 142 **SAMPLE SIZE**

143 We aimed to have a sample size large enough to estimate the proportion of paediatric admissions with  
144 any stage of noma admitted to the Inpatient Therapeutic Feeding Centre (ITFC) or other wards. This  
145 calculation was based on the following assumptions:

- 146 - 6%- Inpatient department proportion of patients diagnosed with any stage of noma (as this  
147 had a lower proportion of any stage of noma diagnosed than the ITFC [35])
- 148 - 95% confidence interval
- 149 - 1.5% margin of error (i.e., can estimate a proportion between 4.5 and 7.5% assuming a true  
150 proportion of 6%)

151 The sample size calculation showed that it was necessary to include 963 patients in the ITFC and 963  
152 patients in the other wards.

### 153 **ANALYSIS**

154 We performed a descriptive analysis of the data collected. Categorical variables are shown as  
155 frequencies and percentages. Continuous variables were summarised using means and standard



156 deviations (SD) or medians and interquartile ranges (IQR) depending on normality. Missing data  
157 numbers are recorded in each table.

158 Age was categorised into 0-1 years, 2-6 years and 7-12 years. This age categorisation was selected as  
159 children aged between two and six years have previously been reported to be at higher risk of noma [3].

160 Malnutrition estimates are not reported for participants aged zero to five months as we did not have  
161 access to the confirmed birthweights of these children [36].

162 For children aged six months to 5 years, using Mid-Upper Arm Circumference (MUAC) measurements  
163 taken upon admission, we estimated the proportion of severe acute malnutrition (SAM, MUAC  
164 <115mm), moderate acute malnutrition (MAM, between MUAC  $\geq$ 115 and <125mm) and global acute  
165 malnutrition (GAM, MUAC <125mm) [36].

166 For those aged six to 12 years, we report the WHO recommended Body Mass Index (BMI)-for-age Z-  
167 scores [36]. BMI was calculated based on the weight (in kg) divided by the square of the height (in m)  
168 of the individual. BMI-for- age are presented as Z-scores based on the 2007 WHO Growth Reference  
169 [36].

170 Wealth scores were calculated by assigning a value of one to each of the following items owned by the  
171 family: cell phone, radio, motorbike, tractor, bicycle, car (these items were chosen based on consultation  
172 with local researchers, knowledgeable about the context). The minimum wealth score was zero and the  
173 maximum was six, all items weighed equally in the scoring.

174 We compared the proportion of admissions with each stage of noma between those admitted to the  
175 ITFC and those admitted to other wards using a Pearson's chi-square test.

176 We calculated the number of admissions who had any stage of noma upon admission, and the outcome  
177 of those patients (noma stage at discharge) for all those who had oral examinations on both admission  
178 and discharge.

179 We assessed risk factors for simple gingivitis using univariate logistic regression (patient age, wealth  
180 score, ITFC admission status, if the child was sick during the past 3 months, parent primary caretaker,

181 if child had been given colostrum at birth, if the child eats pap, if the child was vaccinated, SAM,  
182 MAM and GAM status upon admission, measles, and malaria diagnoses). These variables were  
183 selected as they are reported risk factors for noma [1,8–27]. We conducted an exploratory analysis of  
184 risk factors for acute necrotizing gingivitis; proportions are reported.

185 All data analysis was conducted with Stata 17 (StataCorp LP, College Station, TX, USA).

## 186 **ETHICS**

187 The Médecins Sans Frontières Ethics Review Board (ERB) (2017), Nigerian Federal Ministry of Health  
188 ERB (NHREC/01/01/2007-29/04/2021), Zamfara Ministry of Health ERB (ZSHREC01112020) and  
189 the Usman Danfodiyo University Teaching Hospital Health Research and Ethics Committee in Nigeria  
190 (NHREC/30/012/2019) approved the study protocol.

191 Caregivers of participants were asked to sign an informed consent form and participants aged between  
192 seven and 12 years were informed about the study and asked to sign an assent form after reading/  
193 hearing the information provided on the information sheet. For participants or caregivers who were  
194 illiterate, we requested them to provide an initial and a thumb print as a representation of consent, with  
195 additional participation from an independent literate witness who checked that the participant/ caregiver  
196 understood the contents of the consent form. This witness co-signed the consent form. The information  
197 sheet and the informed consent and assent forms were written in English and Hausa.

## 198 **RESULTS**

---

### 199 **SOCIODEMOGRAPHIC CHARACTERISTICS**

200 Of those caregivers approached (n=2356), six did not provide consent and four did not provide assent  
201 to be part of the study; thus 2346 participants were enrolled and included in the analysis, 2340 of  
202 these had a discharge assessment. Caregivers were mainly aged between 18 and 25 years (n=1036,  
203 44.3%) and 26 to 35 years (n=946, 40.5%), female (n=2318, 99.2%) and the mother of the child  
204 (n=2211, 94.6%). The main source of income of most families was agriculture (n=1285, 55.0%). Most  
205 (n=1696, 72.3%) families owned zero to two items on the wealth score list. Half the child participants

206 were female (n=1181, 50.6%), most were aged between zero and one years (n=1097, 47.1%) or two to  
 207 six years (n=1135, 48.8%) (Table 1).

208 **Table 1- Sociodemographic characteristics, noma study Anka General Hospital 2021**

| Caretaker age                                                           | N=2346 | %     |
|-------------------------------------------------------------------------|--------|-------|
| 18 - 25 years                                                           | 1036   | 44.3% |
| 26 - 35 years                                                           | 946    | 40.5% |
| 36 - 45 years                                                           | 283    | 12.1% |
| > 46 years                                                              | 71     | 3.1%  |
| Missing                                                                 | 10     |       |
| Caretaker sex                                                           |        |       |
| Female                                                                  | 2318   | 99.2% |
| Male                                                                    | 19     | 0.8%  |
| Missing                                                                 | 9      |       |
| Caretaker education                                                     |        |       |
| None                                                                    | 732    | 31.3% |
| Arabic studies                                                          | 1499   | 64.1% |
| Primary school                                                          | 54     | 2.3%  |
| Secondary school                                                        | 50     | 2.1%  |
| University                                                              | 2      | 0.1%  |
| Missing                                                                 | 9      |       |
| Income                                                                  |        |       |
| Agriculture                                                             | 1285   | 55.0% |
| Trader                                                                  | 745    | 31.9% |
| Mining                                                                  | 88     | 3.8%  |
| Daily labourer                                                          | 53     | 2.3%  |
| Civil servant                                                           | 43     | 1.8%  |
| Livestock                                                               | 37     | 1.6%  |
| Other                                                                   | 85     | 3.6%  |
| Missing                                                                 | 10     |       |
| Relationship to child                                                   |        |       |
| Mother                                                                  | 2211   | 94.6% |
| Other                                                                   | 125    | 5.4%  |
| Missing                                                                 | 10     |       |
| Wealth score (own: cell phone, radio, motorbike, tractor, bicycle, car) |        |       |
| 0-2 items                                                               | 1696   | 72.3% |
| 3-6 items                                                               | 650    | 27.7% |
| Child gender                                                            |        |       |
| Female                                                                  | 1181   | 50.6% |
| Male                                                                    | 1154   | 49.4% |
| Missing                                                                 | 11     |       |
| Child age (years)                                                       |        |       |
| 0-1                                                                     | 1097   | 47.1% |
| 2-6                                                                     | 1135   | 48.8% |
| 7-12                                                                    | 95     | 4.1%  |

|         |    |
|---------|----|
| Missing | 19 |
|---------|----|

209

210 **HEALTH CARE ACCESS AND PRIMARY DIAGNOSES**

211 Caregivers reported several challenges accessing care including difficulties with transport (n=454,  
 212 19.4%) and the hospital being far from their home (n=432, 18.4%). Half of the respondents (n=1176,  
 213 50.4%) reported that the child had been sick in the prior three months (not including the illness that  
 214 made them seek care on the day of enrolment). Of these, almost all (n=1069, 90.9%) sought care for  
 215 that illness, many from a street pharmacist (n=424, 39.7%) (Table 2).

216 **Table 2- Health care access noma study Anka General Hospital 2021**

| Challenges when accessing care                                                                        | N= 2346 | %     |
|-------------------------------------------------------------------------------------------------------|---------|-------|
| Transport difficult                                                                                   | 454     | 19.4% |
| Far to get to hospital                                                                                | 432     | 18.4% |
| Difficult to leave other children                                                                     | 22      | 0.9%  |
| Takes a long time to get to hospital                                                                  | 52      | 2.2%  |
| Child very sick, difficult to travel                                                                  | 6       | 0.3%  |
| Difficult to get permission to travel from family                                                     | 6       | 0.3%  |
| Cost of care too expensive                                                                            | 13      | 0.6%  |
| No challenges                                                                                         | 1505    | 64.2% |
| Has your child been sick in the past 3 month? (other than the sickness that made you seek care today) |         |       |
| No                                                                                                    | 1157    | 49.6% |
| Yes                                                                                                   | 1176    | 50.4% |
| Missing                                                                                               | 13      |       |
| If yes, did you seek care due to that sickness? (N=1176)                                              |         |       |
| No                                                                                                    | 104     | 8.8%  |
| Yes                                                                                                   | 1069    | 90.9% |
| Where did you seek care? (N=1069)                                                                     |         |       |
| Hospital                                                                                              | 297     | 27.8% |
| Clinic                                                                                                | 327     | 30.6% |
| Traditional healer                                                                                    | 62      | 5.8%  |
| Street chemist, pharmacist                                                                            | 424     | 39.7% |

217

218 Of those respondents who had teeth (n=1907, 81.7%), almost all (n= 1652, 86.6%) cleaned their teeth,  
 219 mainly using water (n= 1399, 84.7%). The main reasons for children cleaning their teeth were to get  
 220 clean, bright teeth (n=537, 32.5%) and to get rid of foul breath (n=944, 57.1%). The main reasons for  
 221 children not cleaning their teeth (n=251), were not knowing the benefits of cleaning (n=18, 7.2%) and

222 forgetting to clean their teeth (n= 19, 7.6%). Most children (n=2069, 88.5%) had not had any dental  
 223 issues in the three months prior to study enrolment. The most common oral health issues reported  
 224 (n=265, 11.4%) were a sore in the mouth (n=149, 56.2%), bleeding gums when touched (n=88,  
 225 33.2%) and sore gums (n=34, 12.8%). Almost all the respondents (n=2274, 97.4) had not had an oral  
 226 health check in the past year (Table 3).

227 **Table 3- Oral hygiene and health care noma study Anka General Hospital 2021**

| Does your child have any teeth?                          | N= 2346 | %     |
|----------------------------------------------------------|---------|-------|
| No                                                       | 428     | 18.3% |
| Yes                                                      | 1907    | 81.7% |
| Missing                                                  | 11      |       |
| Does your child clean their teeth? (N=1907)              |         |       |
| Don't know                                               | 4       | 0.2%  |
| No                                                       | 251     | 13.2% |
| Yes                                                      | 1652    | 86.6% |
| Reason for not cleaning (N=251)                          |         |       |
| No time for brushing                                     | 12      | 4.8%  |
| No money for brush and toothpaste                        | 1       | 0.4%  |
| Nobody brushes their teeth in my family                  | 2       | 0.8%  |
| Don't know of any benefits from brushing                 | 18      | 7.2%  |
| Gums are bleeding when brushing                          | 1       | 0.4%  |
| Useless, good teeth are hereditary                       | 6       | 2.4%  |
| Always forget to brush my teeth                          | 19      | 7.6%  |
| Reason for cleaning (N=1652)                             |         |       |
| Clean, bright teeth                                      | 537     | 32.5% |
| Prevention of caries                                     | 279     | 16.9% |
| Prevention of bleeding gums                              | 15      | 0.9%  |
| Prevention of oral ulcer                                 | 107     | 6.5%  |
| To get rid of foul breath                                | 944     | 57.1% |
| Cleaning utensil (N=1652)                                |         |       |
| Toothbrush                                               | 171     | 10.4% |
| Stick                                                    | 2       | 0.1%  |
| Cloth                                                    | 29      | 1.8%  |
| Ash                                                      | 39      | 2.4%  |
| Salt and water                                           | 110     | 6.7%  |
| Water                                                    | 1399    | 84.7% |
| Does your child use toothpaste? (N=1652)                 |         |       |
| No                                                       | 1418    | 85.8% |
| Yes                                                      | 216     | 13.1% |
| No times teeth clean/day (Median, IQR) (N=1652)          |         |       |
|                                                          | 1       | 1,2   |
| How long does your child clean their teeth for? (N=1652) |         |       |
| Less than 3 minutes                                      | 1580    | 95.6% |
| 3 minutes or more                                        | 61      | 3.7%  |

|                                                                                     |         |       |
|-------------------------------------------------------------------------------------|---------|-------|
| Child oral health issues in the past three months?                                  | N= 2346 | %     |
| No                                                                                  | 2069    | 88.6% |
| Yes                                                                                 | 265     | 11.4% |
| Missing                                                                             | 12      |       |
| Oral issues past 3 months (N=265)                                                   |         |       |
| Sore gums                                                                           | 34      | 12.8% |
| Bleeding gums when touched                                                          | 88      | 33.2% |
| Spontaneously bleeding gums                                                         | 12      | 4.5%  |
| Sore in mouth                                                                       | 149     | 56.2% |
| Pus in mouth                                                                        | 4       | 1.5%  |
| Sore jaw                                                                            | 8       | 3.0%  |
| Tooth pain                                                                          | 10      | 3.8%  |
| Has your child visited an oral health care provider for a check-up in the past year |         |       |
| No                                                                                  | 2274    | 97.4% |
| Yes                                                                                 | 60      | 2.6%  |
| Missing                                                                             | 12      |       |
| Oral health provider (N=60)                                                         |         |       |
| Hospital                                                                            | 10      | 16.7% |
| Clinic                                                                              | 26      | 43.3% |
| Traditional healer                                                                  | 14      | 23.3% |
| Street chemist, pharmacist                                                          | 13      | 21.7% |

228

229 The most common primary diagnosis of patients admitted to the hospital were malaria (n= 1086,  
 230 46.3%) and severe acute malnutrition (n=977, 41.6%). The median number of days patients spent in  
 231 the hospital was three (IQR 2, 5) (Table 4).

232 **Table 4- Diagnosis noma study Anka General Hospital 2021**

|                                                 |         |       |
|-------------------------------------------------|---------|-------|
| Primary diagnosis                               | N= 2346 | %     |
| Malaria                                         | 1086    | 46.3% |
| Severe acute malnutrition                       | 977     | 41.6% |
| Measles                                         | 114     | 4.9%  |
| Other                                           | 56      | 2.4%  |
| Lower respiratory tract infection               | 50      | 2.1%  |
| Acute watery diarrhoea                          | 36      | 1.5%  |
| Other                                           | 15      | 0.5%  |
| Length of stay in hospital (days) (Median, IQR) | 3       | 2, 5  |
| Length of stay in hospital (days) (range)       | 0       | 97    |

233

234 **GINGIVITIS AND NOMA DIAGNOSES**

235 Simple gingivitis was diagnosed in 58 patients (2.5%) and acute necrotizing gingivitis was diagnosed  
236 in six patients (0.3%) at admission. At discharge simple gingivitis was diagnosed in nine patients  
237 (0.5%) and acute necrotizing gingivitis was diagnosed in one patient (0.1%) (Table 5).

238 **Table 5- Noma diagnosis upon admission and discharge, noma study Anka General Hospital**  
239 **2021**

| Admission Noma Stage                  | N= 2346 | %     |
|---------------------------------------|---------|-------|
| None                                  | 2256    | 97.2% |
| Stage 0: Simple gingivitis            | 58      | 2.5%  |
| Stage 1: Acute necrotizing gingivitis | 6       | 0.3%  |
| Missing                               | 26      |       |
| Discharge Noma Stage                  |         |       |
| None                                  | 1667    | 99.4% |
| Stage 0: Simple gingivitis            | 9       | 0.5%  |
| Stage 1: Acute necrotizing gingivitis | 1       | 0.1%  |
| Missing                               | 669     |       |

240

241 Of the 34 participants who were diagnosed with simple gingivitis on admission and who had an oral  
242 exam at discharge: 28 (82.4%) had resolved at discharge; five (14.7%) still had simple gingivitis at  
243 discharge; and one (2.9%) had acute necrotizing gingivitis upon discharge. One of the two patients  
244 who had acute necrotizing gingivitis at admission and had an oral exam at discharge, had no stage of  
245 noma at discharge, the other had simple gingivitis at discharge.

246 **MALNUTRITION**

247 Of those patients enrolled in the study who were aged between 6 months and five years and who had a  
248 MUAC measurement completed upon admission (n=2039), n=692 (34.0%) had SAM, n=399 (19.6%)  
249 had MAM and n=1091 (53.5%) had GAM (Table 6).

250 Of the participants aged between six and 12 years who had weight and height measured upon  
251 admission (n=100), 44.0% (n=44) were wasted (BMI/age <-2 z-score). The majority of those admitted  
252 to the ITFC were wasted (n=18, 58.1%), and the majority of those not admitted to the ITFC were  
253 classified with normal BMI z-scores (n=41, 59.2%) (Table 6).

254 **Table 6: Malnutrition (SAM, MAM, GAM) upon admission in those aged 6 months to 5 years**  
 255 **(n=2039) and BMI-for-age Z-scores classification for six to 12 year olds [36]**

|                                      | TOTAL  |       | ITFC  |       | Not ITFC |       | Ch sq |
|--------------------------------------|--------|-------|-------|-------|----------|-------|-------|
| MUAC                                 | N=2039 | %     | N=956 | %     | N=1083   | %     |       |
| Normal, MUAC>125mm                   | 948    | 46.5% | 133   | 13.9% | 815      | 75.3% | <0.05 |
| SAM, MUAC <115mm                     | 692    | 33.9% | 604   | 63.2% | 88       | 8.1%  |       |
| MAM, between MUAC<br>≥115 and <125mm | 399    | 19.6% | 218   | 22.9% | 180      | 16.6% |       |
| GAM, MUAC <125mm                     | 1091   | 53.5% | 823   | 86.1% | 268      | 24.8% | <0.05 |
| BMI-for-age Z-score                  | N=100  | %     | N=31  | %     | N=69     | %     |       |
| Severe thinness (<-3SD)              | 28     | 28.0% | 16    | 51.6% | 12       | 17.4% | <0.05 |
| Thinness (≥ -3 SD & < -2 SD)         | 16     | 16.0% | 2     | 6.5%  | 14       | 20.3% |       |
| Normal (≥ -2 SD & < +1SD)            | 51     | 51.0% | 10    | 32.3% | 41       | 59.2% |       |
| Overweight (≥+1SD & <+2 SD)          | 2      | 2.0%  | 1     | 3.2%  | 1        | 1.5%  |       |
| Obesity (≥+2SD)                      | 3      | 3.0%  | 2     | 6.5%  | 1        | 1.5%  |       |

256

257 **RISK FACTORS**

258 Being aged over two years (2-6yr old odds ratio (OR) 3.4, CI 1.77, 6.5; 7 to 12 yr OR 5.0, CI 1.7,  
 259 14.6; p<0.001) and being admitted to the ITFC (OR 2.1; CI 1.22, 3.62) were associated with having  
 260 simple gingivitis. Those whose primary diagnosis was malaria, were less likely to have simple  
 261 gingivitis upon admission compared to those admitted for other reasons (OR 0.29; CI 0.15, 0.55;  
 262 p<0.001). Of those diagnosed with acute necrotizing gingivitis (n=6) n=4/6 were aged 2-6 years,  
 263 were in the lower wealth score (indicating lower socioeconomic status) and ate pap; n=5/6 children  
 264 had been sick in the 3 months prior to admission (Table 7).

265

266

267



268 **Table 7: Risk factors for stage 0 and 1 on admission**

|                                                                                | Total   |       | Simple gingivitis |       |      |               |        | Acute necrotizing gingivitis |       |
|--------------------------------------------------------------------------------|---------|-------|-------------------|-------|------|---------------|--------|------------------------------|-------|
|                                                                                | N =2346 | %     | N=58              | %     | OR   | 95% CI        | P      | N=6                          | %     |
| <b>Patient age (years)</b>                                                     |         |       |                   |       |      |               | <0.001 |                              |       |
| 0 to 1                                                                         | 1097    | 47.1% | 12                | 20.7% | 1.00 | (Ref)         |        | 0                            | 0.0%  |
| 2 to 6                                                                         | 1135    | 48.8% | 41                | 70.7% | 3.38 | (1.77, 6.47)  |        | 4                            | 66.7% |
| 7 to 12                                                                        | 95      | 4.1%  | 5                 | 8.6%  | 5.03 | (1.73, 14.61) |        | 2                            | 33.3% |
|                                                                                | 2327    |       | 58                |       |      |               |        | 6                            |       |
| <b>Wealth score (own: cell phone, radio, motorbike, tractor, bicycle, car)</b> |         |       |                   |       |      |               | 0.728  |                              |       |
| 0-2 items                                                                      | 1696    | 72.3% | 43                | 74.1% | 1.00 | (Ref)         |        | 4                            | 66.7% |
| 3-6 items                                                                      | 650     | 27.7% | 15                | 25.9% | 0.90 | (0.50, 1.63)  |        | 2                            | 33.3% |
|                                                                                | 2346    |       | 58                |       |      |               |        | 6                            |       |
| <b>ITFC -Child admitted</b>                                                    |         |       |                   |       |      |               | 0.007  |                              |       |
| No                                                                             | 1269    | 54.1% | 21                | 36.2% | 1.00 | (Ref)         |        | 5                            | 83.3% |
| Yes                                                                            | 1077    | 45.9% | 37                | 63.8% | 2.10 | (1.22, 3.62)  |        | 1                            | 16.7% |
|                                                                                | 2346    |       | 58                |       |      |               |        | 6                            |       |
| <b>Malnutrition upon admission in those aged 6 months to 5 years</b>           |         |       |                   |       |      |               | 0.143  |                              |       |
| Normal, MUAC>125mm                                                             | 948     | 46.5% | 17                | 33.3% | 1.00 | (Ref)         |        | 3                            | 75.0% |
| SAM, MUAC <115mm                                                               | 692     | 33.9% | 23                | 45.1% | 1.88 | (1.00, 3.55)  |        | 0                            | 0.0%  |
| MAM, between MUAC ≥115 and <125mm                                              | 399     | 19.6% | 11                | 21.6% | 1.56 | (0.72, 3.36)  |        | 1                            | 25.0% |
|                                                                                | 2039    |       | 51                |       |      |               |        | 4                            |       |
| <b>GAM upon admission in those aged 6 months to 5 years</b>                    |         |       |                   |       |      |               | 0.059  |                              |       |
| Normal, MUAC>=125mm                                                            | 948     | 46.5% | 17                | 33.3% | 1.00 | (Ref)         |        | 3                            | 75.0% |
| GAM, MUAC <125mm                                                               | 1091    | 53.5% | 34                | 66.7% | 1.76 | (0.98, 3.18)  |        | 1                            | 25.0% |
|                                                                                | 2039    |       | 51                |       |      |               |        | 4                            |       |
| <b>Child sick past 3 months</b>                                                |         |       |                   |       |      |               | 0.942  |                              |       |
| No                                                                             | 1157    | 49.6% | 29                | 50.0% | 1.00 | (Ref)         |        | 1                            | 16.7% |
| Yes                                                                            | 1176    | 50.4% | 29                | 50.0% | 0.98 | (0.58, 1.65)  |        | 5                            | 83.3% |

|                                                                                                  |     |      |       |    |       |      |              |  |   |       |
|--------------------------------------------------------------------------------------------------|-----|------|-------|----|-------|------|--------------|--|---|-------|
|                                                                                                  |     | 2333 |       | 58 |       |      |              |  | 6 |       |
| <b>Primary caretaker</b>                                                                         |     |      |       |    |       |      | 0.817        |  |   |       |
|                                                                                                  | No  | 266  | 11.4% | 6  | 10.3% | 1.00 | (Ref)        |  | 2 | 33.3% |
|                                                                                                  | Yes | 2070 | 88.6% | 52 | 89.7% | 1.11 | (0.47, 2.60) |  | 4 | 66.7% |
|                                                                                                  |     | 2336 |       | 58 |       |      |              |  | 6 |       |
| <b>Colostrum given at birth</b>                                                                  |     |      |       |    |       |      | 0.201        |  |   |       |
|                                                                                                  | No  | 669  | 28.7% | 21 | 36.2% | 1.00 | (Ref)        |  | 2 | 33.3% |
|                                                                                                  | Yes | 1663 | 71.3% | 37 | 63.8% | 0.70 | (0.41, 1.21) |  | 4 | 66.7% |
|                                                                                                  |     | 2332 |       | 58 |       |      |              |  | 6 |       |
| <b>Does your child eat pap?</b>                                                                  |     |      |       |    |       |      | 0.163        |  |   |       |
|                                                                                                  | No  | 589  | 25.2% | 10 | 17.2% | 1.00 | (Ref)        |  | 2 | 33.3% |
|                                                                                                  | Yes | 1746 | 74.8% | 48 | 82.8% | 1.63 | (0.82, 3.25) |  | 4 | 66.7% |
|                                                                                                  |     | 2335 |       | 58 |       |      |              |  | 6 |       |
| <b>Was your child vaccinated?</b>                                                                |     |      |       |    |       |      | 0.434        |  |   |       |
|                                                                                                  | No  | 922  | 39.5% | 20 | 34.5% | 1.00 | (Ref)        |  | 2 | 33.3% |
|                                                                                                  | Yes | 1410 | 60.5% | 38 | 65.5% | 1.24 | (0.72, 2.15) |  | 4 | 66.7% |
|                                                                                                  |     | 2332 |       | 58 |       |      |              |  | 6 |       |
|                                                                                                  |     |      |       |    |       |      |              |  |   |       |
| <b>Malaria- primary diagnosis</b>                                                                |     |      |       |    |       |      | <0.001       |  |   |       |
|                                                                                                  | No  | 1246 | 53.5% | 46 | 79.3% | 1.00 | (Ref)        |  | 3 | 50.0% |
|                                                                                                  | Yes | 1084 | 46.5% | 12 | 20.7% | 0.29 | (0.15, 0.55) |  | 3 | 50.0% |
|                                                                                                  |     | 2330 |       | 58 |       |      |              |  | 6 |       |
| <b>Measles- primary diagnosis</b>                                                                |     |      |       |    |       |      | 0.191        |  |   |       |
|                                                                                                  | No  | 2216 | 95.1% | 53 | 91.4% | 1.00 | (Ref)        |  | 5 | 83.3% |
|                                                                                                  | Yes | 114  | 4.9%  | 5  | 8.6%  | 1.87 | (0.73, 4.77) |  | 1 | 16.7% |
|                                                                                                  |     | 2330 |       | 58 |       |      |              |  | 6 |       |
|                                                                                                  |     |      |       |    |       |      |              |  |   |       |
| OR = odds ratio; CI = confidence interval; P = p value from univariate logistic regression model |     |      |       |    |       |      |              |  |   |       |

## 270 **DISCUSSION**

---

271 A small proportion of those enrolled in this study had simple gingivitis (2.5%) or acute necrotizing  
272 gingivitis (0.3%) at admission, and no later stages of noma were identified in the cohort. Oral health  
273 practices were not optimal and access to oral health care was limited and underutilised. Those in the  
274 ITFC were more likely to have simple gingivitis. Known risk factors for noma (malnutrition and  
275 being aged between two and six years) were associated with simple gingivitis in our cohort.

276

277 Our findings were similar to a community-based noma study in northwest Nigeria in 2020 where  
278 simple gingivitis was identified in 3.1% (n=181; 95% CI 2.6 to 3.8), acute necrotising gingivitis in  
279 0.1% (n=10; CI 0.1 to 0.3) and oedema in 0.05% (n=3; CI 0.02 to 0.2) [34]. These similarities were  
280 expected as the studies were conducted a similar region (northwest Nigeria). However, as our study  
281 was conducted in a hospital setting with a large proportion of patients being treated for malnutrition, it  
282 could have been expected that we would have seen more noma cases being diagnosed. One plausible  
283 explanation for this not being the case, is that the age range of our survey included a significant  
284 number of children aged under two years (47.1%), which is an age group less at risk of developing  
285 noma.

286 A study conducted in Cameroon in 2015 including school children (n=2287) [37] found similar  
287 proportions of cases with gingivitis as in our study (2.1% had moderate gingivitis which could reflect  
288 our simple gingivitis cases and 0.6% had severe gingivitis which could reflect our acute necrotizing  
289 gingivitis cases), however comparison is difficult as the study methods and definitions differed  
290 significantly.

291 The caregivers in our cohort reported several challenges accessing care; these are similar to  
292 challenges reported in other noma research work in this setting, including difficulties accessing  
293 transport and the long distances patients and their caregivers need to travel in order to access care  
294 [38,39]. These issues should be taken into consideration for programs aiming to alleviate barriers to  
295 health care in this setting.

296 Many of the respondents who sought care sought care for a prior illness first visited a street  
297 pharmacist (39.7%) showing that they would be important agents for promoting oral health and  
298 awareness about noma. This finding is supported by another study in Northern Nigeria which showed  
299 that engaging community pharmacists may help to reduce oral health disparities by increasing oral  
300 health awareness and improving the quality of life via cost-effective delivery of pharmacy-based oral  
301 health-care services [40].

302 Many respondents reported cleaning their teeth (86.6%), however the main utensil used was water  
303 (84.7%), and only 10.4% reported using a toothbrush. The importance of tooth brushing and  
304 mechanisms to encourage and facilitate tooth brushing have been discussed in other literature  
305 [2,37,41–43]. In our cohort, the main reasons for children cleaning their teeth were to get clean, bright  
306 teeth (32.5%) and to get rid of foul breath (57.1%). The main reasons for children not cleaning their  
307 teeth, were not knowing the benefits of cleaning (7.2%) and forgetting to clean their teeth (7.6%).  
308 These provide useful starting points for oral hygiene trainings which should focus on educating  
309 children and caregivers on the benefits of tooth brushing, teaching mechanisms for instilling  
310 toothbrushing into the daily routine, and explaining that toothbrushing will lead to having nice  
311 smelling breath and clean, bright teeth.

312 The most common oral health issues patients reported having in the prior three months were a sore in  
313 the mouth (56.2%), bleeding gums when touched (33.2%) and sore gums (12.8%). These issues are all  
314 likely varying degrees of gingivitis and show that children living in the communities served by the  
315 hospital show the clinical effects of poor oral hygiene and that most oral complaints are transient, and  
316 not chronic or progressive.

317 Almost all the respondents (97.4%) had not had an oral health check in the past year. This low level of  
318 access and uptake of oral care is similar to other studies in the setting [44–47]. The main reasons for  
319 the lack of oral health care that have been reported are a lack of human resources, high costs of care,  
320 sparse provision of services and low levels of knowledge about different treatment options for oral  
321 conditions [44–47]. These barriers indicate the need to incorporate oral health into primary health care  
322 in this setting, a call common in oral health literature [45–47]. In terms of noma, it would be worthwhile

323 encouraging the inclusion of oral examinations in primary health care provision, malnutrition surveys  
324 and vaccination campaigns, particularly in vulnerable populations.

325 Those admitted to the ITFC were more likely to be diagnosed with simple gingivitis. This adds weight  
326 to the link between noma and malnutrition [8–10,28–30]; however, caution is needed when  
327 interpreting these findings as most cases of simple gingivitis do not lead to noma.

328 The most common primary diagnosis of patients admitted to the hospital were malaria (46.3%) and  
329 severe acute malnutrition (41.6%). Both of these conditions have been reported as risk factors for the  
330 development of noma [8–10,48]. However, our univariate analysis did not support this, possibly  
331 because our analysis was looking at risk factors for simple gingivitis, whereas the references are  
332 reporting risk factors for late stage noma. Another limitation is that our analysis was based on  
333 diagnosis at the same time as assessment of any stage of noma, whereas the references discuss  
334 diagnosis of comorbidities in the three months prior to onset of noma.

335 A further limitation was that we only recruited patients during the day time, this could have meant  
336 that patients with serious, acute complications (such as late stage noma) admitted at night time, were  
337 not included in our survey.

338 Our survey was conducted during the rainy season, which could have resulted in a possible bias, as  
339 this time of year could have meant increased difficulties for sicker patients to travel to the hospital  
340 which could have meant fewer later stage noma patients reached care. It could also have meant  
341 increased food insecurity, or difference in the epidemiology of other morbidities in the area. Future  
342 studies in other seasons or the year-round inclusion or oral screenings in routine activities could offer  
343 insight into whether or not the season affects the number of simple and acute necrotizing gingivitis  
344 cases identified in this context.

## 345 **CONCLUSION**

346 Our study showed a small proportion of those admitted to the Anka General Hospital, Zamfara, had  
347 simple or acute necrotizing gingivitis, most of which had resolved upon discharge. Those admitted to  
348 the ITFC were more likely to have simple gingivitis, providing evidence of the link between

349 malnutrition and the warning sign of noma. Many of those in our study cohort exhibited known risk  
350 factors for noma such as being malnourished, having a comorbidity, low socioeconomic status, poor  
351 oral hygiene practices, and a lack of access to healthcare, indicating there is a large population at risk  
352 of developing later stage noma in this setting. The lack of access to and uptake of oral health care  
353 indicates a strong need for oral exams to be included in routine health services. This provision could  
354 improve the oral status of the population and decrease the chance of patients developing later stage  
355 noma.  
356

---

357 **AUTHOR STATEMENTS**

---

358 **Acknowledgements**

359 Thank you to the participants in this study. A big thank you to the study team for all their hard work  
360 and dedication to this project. Thanks to Vincent Kimui Ndichu, Christian Mwemezi and Rahima  
361 Shuaibu for their contribution to the study. We would also like to thank all the health care workers who  
362 are advocating for and treating noma patients around the world.

363 **Conflict of interest**

364 The authors declare no conflict of interest.

365 **Funding**

366 This study was funded by MSF as part of the Noma Operational Research Agenda.

367 **Ethics**

368 The MSF Ethics Review Board (ERB) (2017), Nigerian Federal Ministry of Health ERB  
369 (NHREC/01/01/2007-29/04/2021), Zamfara Ministry of Health ERB (ZSHREC01112020) and the  
370 Usman Danfodiyo University Teaching Hospital Health Research and Ethics Committee in Nigeria  
371 (NHREC/30/012/2019) approved the study protocol.

372 **Data Availability Statement**

373 MSF has a managed access system for data sharing that respects MSF's legal and ethical obligations to  
374 its patients to collect, manage and protect their data responsibility. Ethical risks include but are not  
375 limited to the nature of MSF operations and target populations being such that data collected often  
376 involves highly sensitive data. The dataset supporting the conclusions of this article is available on  
377 request in accordance with MSF's data sharing policy (available at: [http://](http://fieldresearch.msf.org/msf/handle/10144/306501)  
378 [fieldresearch.msf.org/msf/handle/10144/306501](http://fieldresearch.msf.org/msf/handle/10144/306501)). Requests for access to data should be made to  
379 [data.sharing@msf.org](mailto:data.sharing@msf.org).

380 **REFERENCES**

---

- 381 1. Ashok N, Tarakji B, Darwish S, Rodrigues JC, Altamimi MA. A Review on Noma: A Recent  
382 Update. *Glob J Health Sci* [Internet]. 2016;8(4):53–9. Available from:  
383 [http://www.ccsenet.org/journal/index.php/gjhs/article/view/48228doi: 10.5539/gjhs.v8n4p53](http://www.ccsenet.org/journal/index.php/gjhs/article/view/48228doi:10.5539/gjhs.v8n4p53)
- 384 2. World Health Organization Regional Office for Africa. Information brochure for early  
385 detection and management of noma. 2017. [Internet]. Available from  
386 <https://apps.who.int/iris/handle/10665/254579>; 2017. Available from:  
387 <https://apps.who.int/iris/handle/10665/25457979%0AAdditional>
- 388 3. World Health Organisation (WHO). Noma [Internet]. [cited 2017 Nov 13]. Available from:  
389 <http://www.who.int/topics/noma/en/>
- 390 4. Baratti-Mayer D, Pittet B, Montandon D, Bolivar I, Bornand JE, Jaquinet A, Schrenzel J, Pittet  
391 D, Hugonnet S, Jaquinet A, Schrenzel J, Pittet D. Noma : an “ infectious ” disease of unknown  
392 aetiology. *Lancet Infect*. 2003;3(7):419–31. doi: 10.1016/s1473-3099(03)00670-4
- 393 5. Silva K, Twaddell S, Powers D. A 40-year-old man with a perforated cheek. *Am J Med Sci*  
394 [Internet]. 2011;341(5):399–403. Available from:  
395 <http://dx.doi.org/10.1097/MAJ.0b013e3181e2ed3e>doi: 10.1097/maj.0b013e3181e2ed3e
- 396 6. Feller L, Altini M, Chandran R, Khammissa RAG, Masipa JN, Mohamed A, Lemmer J. Noma  
397 (cancrum oris) in the South African context. *J Oral Pathol Med*. 2014;43(1):1–6. doi:  
398 10.1111/jop.12079
- 399 7. Shaye D, Winters R, Rabbels J, Adentunje A, Magee A, Vo D. Noma Surgery. *Laryngoscope*.  
400 2019;129:96–9. doi: 10.1002/lary.27230
- 401 8. Adeniyi S, Awosan K. Pattern of Noma (Cancrum Oris) and its risk factors in northwestern  
402 Nigeria: a hospital-based retrospective study. *Ann Afr Med*. 2019;18(1):17–22. doi:  
403 10.4103/aam.aam



- 404 9. Lazarus D. Cancrum oris - a 35-year retrospective study. *S Afr Med J.* 1997;87:1379–82.
- 405 10. Denloye O, Aderinokun G, Lawoyin J, Bankole O. Reviewing trends in the incidence of  
406 cancrum oris in Ibadan, Nigeria. *West Afr J Med.* 2003;22(1):26–9.
- 407 11. Ghosh K. Use of penicillin in cancrum oris. *Indian J Pediatr.* 1947;14(4):171–172. doi:  
408 <https://link.springer.com/article/10.1007%2fbf02812636?li=true>
- 409 12. Pedro K, Smit D, Morkel J. Cancrum Oris (noma) in an HIV-positive adult: a case report and  
410 literature review. *SADJ.* 2016;71(6):248–52.
- 411 13. Koech K. Cancrum oris in an adult with human immunodeficiency virus infection: case report.  
412 *East Afr Med J.* 2010;87(1):38–40.
- 413 14. Sykes L, Essop R. Combination intraoral and extraoral prosthesis used for rehabilitation of a  
414 patient treated for cancrum oris: A clinical report. *J Prosthet Dent.* 2000;613–6.
- 415 15. Chidzonga M. HIV/AIDS orofacial lesions in 156 Zimbabwean patients at referral oral and  
416 maxillofacial surgical clinics. *Oral Dis.* 2003;9:317–22.
- 417 16. Barrios T, Aria A, Brahney C. Cancrum oris in an HIV-positive patient. *J Oral Maxillofac*  
418 *Surg.* 1995;53(7):851–5. doi: <https://www.ncbi.nlm.nih.gov/pubmed/7595806>
- 419 17. Fayrer J. A case of acute malarial poisoning, enteric fever ensuing, complicated by brain and  
420 lung symptoms, also by extensive cancrum oris. *Lancet.* 1889(2):296–300.
- 421 18. Auluck A, Pai K. Noma: life cycle of a devastating sore - case report and literature review. *J*  
422 *Can Dent Assoc.* 2005;71(10):757a-e.
- 423 19. Gupta P, Chakravarty N. Penicillin in Cancrum Oris Complicating Kala-Azar. *Ind Med Gaz.*  
424 1945;542–5.
- 425 20. Usher S, Ross D. A case of cancrum oris following typhoid fever with plastic repair. *Can Med*

- 426 Assoc J. 1931;446–9.
- 427 21. Weledji E, Njong S. Cancrum Oris (noma): the role of nutrition in management. *J Am Coll*  
428 *Clin Wound Spec* [Internet]. 2016;7:50–2. Available from:  
429 <http://dx.doi.org/10.1016/j.jccw.2016.08.003>doi: 10.1016/j.jccw.2016.08.003
- 430 22. Chiandussi S, Luzzati R, Tirelli G, Lenarda R, Biasotto M. Cancrum oris in developed  
431 countries. *Aging Clin Exp Res*. 2009;21(6):475–7.
- 432 23. Hefferman L. Cancrum oris treated by excision and subsequent tube grafting. *Ind Med Gaz*.  
433 1923;434–7.
- 434 24. Jelliffe D. Infective gangrene of the mouth (Cancrum Oris). *Pediatrics*. 1952;9(544):1–9.
- 435 25. Barrera J, Connor M. Noma in an Afghani child: A case report. *Int J Pediatr Otorhinolaryngol*  
436 [Internet]. 2012;76(5):742–4. Available from:  
437 <http://dx.doi.org/10.1016/j.ijporl.2012.01.034>doi: 10.1016/j.ijporl.2012.01.034
- 438 26. Srour L, Watt B, Phengdy B, Khansoulivong K, Harris J, Bennett C, Strobel M, Dupuis C,  
439 Newton P. Noma in Laos: Stigma of severe poverty in rural Asia. *Am J Trop Med Hyg*.  
440 2008;78(4):539–42.
- 441 27. Maley A, Desai M, Parker S. Noma: A disease of poverty presenting at an urban hospital in the  
442 United States. *JAAD Case Reports*. 2015;1(1):18–20. doi: 10.1016/j.jdcr.2014.10.001
- 443 28. Baratti-Mayer D, Gayet-Ageron A, Hugonnet S, François P, Pittet-Cuenod B, Huyghe A,  
444 Bornand J, Gervaix A, Montandon D, Schrenzel J, Mombelli A, Pittet D. Risk factors for  
445 noma disease: a 6-year, prospective, matched case-control study in Niger. *Lancet Glob Heal*.  
446 2013;1(2):87–96. doi: 10.1016/s2214-109x(13)70015-9
- 447 29. Enwonwu C, Phillips R, Ferrell C. Temporal relationship between the occurrence of fresh  
448 noma and the timing of linear growth retardation in Nigerian children. *Trop Med Int Heal*.

- 449 2005;10(1):65–73.
- 450 30. Oginni F, Oginni A, Ugboko V, Otuyemi O. A survey of cases of cancrum oris seen in Ile-Ife,  
451 Nigeria. *Int J Paediatr Dent*. 1999;9:75–80.
- 452 31. World Health Organization, OMS. World Health Report Life in the 21st century A vision for  
453 all Report of the Director-General. 51st World Heal Assem [Internet]. 1998;1–226. Available  
454 from: [https://www.who.int/whr/1998/en/whr98\\_en.pdf?ua=1](https://www.who.int/whr/1998/en/whr98_en.pdf?ua=1)
- 455 32. Fieger A, Marck KW, Busch R, Schmidt A. An estimation of the incidence of noma in north-  
456 west Nigeria. *Trop Med Int Heal*. 2003;8(5):402–7. doi: 10.1046/j.1365-3156.2003.01036.x
- 457 33. Bello SA, Adeoye JA, Oketade I, Akadiri OA. Estimated incidence and prevalence of noma in  
458 north central Nigeria, 2010–2018: A retrospective study. *PLoS Negl Trop Dis* [Internet].  
459 2019;13(7):2010–8. Available from: <http://dx.doi.org/10.1371/journal.pntd.0007574>doi:  
460 10.1371/journal.pntd.0007574
- 461 34. Farley E, Oyemakinde MJ, Schuurmans J, Ariti C, Saleh F, Uzoigwe G, Bil K, Oluyide B,  
462 Fotso A, Amirtharajah M, Vyncke J, Brechard R, Adetunji AS, Ritmeijer K, Van Der Kam S,  
463 Baratti-Mayer D, Mehta U, Isah S, Ihekweazu C, et al. The prevalence of noma in northwest  
464 Nigeria. *BMJ Glob Heal*. 2020;5(4):1–15. doi: 10.1136/bmjgh-2019-002141
- 465 35. Médecins Sans Frontières. Risk factors for gingivitis in Anka General Hospital- internal report  
466 from cross-sectional operational research study. Anka, Zamfara; 2018.
- 467 36. Emergency Nutrition Network Global Nutrition Cluster. The Harmonised Training Package  
468 (HTP): Resource Material for Training on Nutrition in Emergencies, Version 2 [Internet].  
469 NutritionWorks. 2011. Available from: [https://www.enonline.net/attachments/1051/m6-](https://www.enonline.net/attachments/1051/m6-measuring-malnutrition-individual-assessment-entire-module.pdf)  
470 [measuring-malnutrition-individual-assessment-entire-module.pdf](https://www.enonline.net/attachments/1051/m6-measuring-malnutrition-individual-assessment-entire-module.pdf)
- 471 37. Azodo CC, Agbor AM. Gingival health and oral hygiene practices of schoolchildren in the  
472 North West Region of Cameroon. *BMC Res Notes*. 2015;4–9. doi: 10.1186/s13104-015-1350-

- 473 2
- 474 38. Farley E. Noma in northwest Nigeria: a neglected disease in neglected populations [Internet].  
475 University of Cape Town; 2020. Available from:  
476 <https://open.uct.ac.za/handle/11427/32757?show=full>
- 477 39. Farley E, Mehta U, Srour ML, Lenglet A. Noma (cancrum oris): A scoping literature review of  
478 a neglected disease (1843 to 2021). *PLoS Negl Trop Dis* [Internet]. 2021;15(12):e0009844.  
479 Available from: <http://dx.doi.org/10.1371/journal.pntd.0009844>:  
480 [10.1371/journal.pntd.0009844](https://doi.org/10.1371/journal.pntd.0009844)
- 481 40. Taiwo OO, Panas R. Roles of community pharmacists in improving oral health awareness in  
482 Plateau State, Northern Nigeria. *Int Dent J* [Internet]. 2018;68(4):287–94. Available from:  
483 <https://doi.org/10.1111/idj.12383>doi: [10.1111/idj.12383](https://doi.org/10.1111/idj.12383)
- 484 41. Trotter A, Cismas I. Noma & Human Rights Law – A Doctrinal Legal Analysis with Focus on  
485 Burkina Faso, Niger and Laos, Background Study. 2020.
- 486 42. World Health Organisation (WHO) and Hilfsaktion Noma. Promoting Oral Health in Africa:  
487 Prevention and control of oral diseases and noma as part of essential noncommunicable  
488 disease interventions [Internet]. 2016. Available from:  
489 [http://www.aho.afro.who.int/en/news/5236/official-launch-who-manual-“promoting-oral-](http://www.aho.afro.who.int/en/news/5236/official-launch-who-manual-“promoting-oral-health-africa”)  
490 [health-africa”](http://www.aho.afro.who.int/en/news/5236/official-launch-who-manual-“promoting-oral-health-africa”)
- 491 43. Vriese SD De. Moving from Daji towards Noma: Changing the perception of a spiritual  
492 towards a treatable disease: A case study of Hilfsaktion Noma eV in Niger [Internet]. 2021.  
493 Available from: [https://www.diva-](https://www.diva-portal.org/smash/record.jsf?pid=diva2:1573547%0Ahttps://www.diva-portal.org/smash/get/diva2:1573547/FULLTEXT01.pdf)  
494 [portal.org/smash/record.jsf?pid=diva2:1573547%0Ahttps://www.diva-](https://www.diva-portal.org/smash/record.jsf?pid=diva2:1573547%0Ahttps://www.diva-portal.org/smash/get/diva2:1573547/FULLTEXT01.pdf)  
495 [portal.org/smash/get/diva2:1573547/FULLTEXT01.pdf](https://www.diva-portal.org/smash/get/diva2:1573547/FULLTEXT01.pdf)
- 496 44. Agbelusi G, Jeboda S. Oral health status of 12-year old Nigerian children. *WAJM*.

- 497 2006;25(3):195–8.
- 498 45. Adeniyi AA, Sofola OO, Kalliecharan R V. An appraisal of the oral health care system in  
499 Nigeria. *Int Dent J*. 2012 Dec;62(6):292–300. doi: 10.1111/j.1875-595x.2012.00122.x
- 500 46. Uguru N, Onwujekwe O, Ogu UU, Uguru C. Access to Oral health care: A focus on dental  
501 caries treatment provision in Enugu Nigeria. *BMC Oral Health* [Internet]. 2020 May 19 [cited  
502 2023 May 10];20(1):1–13. Available from:  
503 <https://bmcoralhealth.biomedcentral.com/articles/10.1186/s12903-020-01135-1>doi:  
504 10.1186/s12903-020-01135-1/figures/2
- 505 47. Uguru N, Onwujekwe O, Uguru C, Ogu U, Okwuosa C, Okeke C. Oral health-seeking  
506 behavior among different population groups in Enugu Nigeria. *PLoS One* [Internet]. 2021 Feb  
507 1 [cited 2023 May 10];16(2):e0246164. Available from:  
508 <https://journals.plos.org/plosone/article?id=10.1371/journal.pone.0246164>doi:  
509 10.1371/journal.pone.0246164
- 510 48. Konsem, T, Millogo, M, Assouan, C, Ouedraogo D. Evolving form of cancrum oris, about 55  
511 cases collected at the Academic Hospital Yalgado Ouedraogo of Ouagadougou. *Bull Soc*  
512 *Pathol Exot*. 2014;107:74–8. doi: 10.1007/s13149-014-0338-9
- 513
